# Supplementary material
Source: PubMed Central journal article supplement (PMC2887067)
Supplement: mcq046_1.pdf [file mcq046_1.pdf]

## SUPPLEMENTARY DATA

FIG. S1. Mn tissue concentration of rice leaf blades of different leaf age before and after elevated Mn supply (50  $\mu\text{M}$ ) for 72 h. Different upper case letters indicate significant differences ( $P < 0.05$ ) between different Mn levels of one leaf age according to Tukey; different lower case letters indicate significant differences ( $P < 0.05$ ) between different leaf ages of one level of Mn treatment. Different levels of significance according to a two-factor ANOVA for  $P < 0.001$ ,  $P < 0.01$ ,  $P < 0.05$  and non-significant are labelled with \*\*\*, \*\*, \* and ns, respectively.

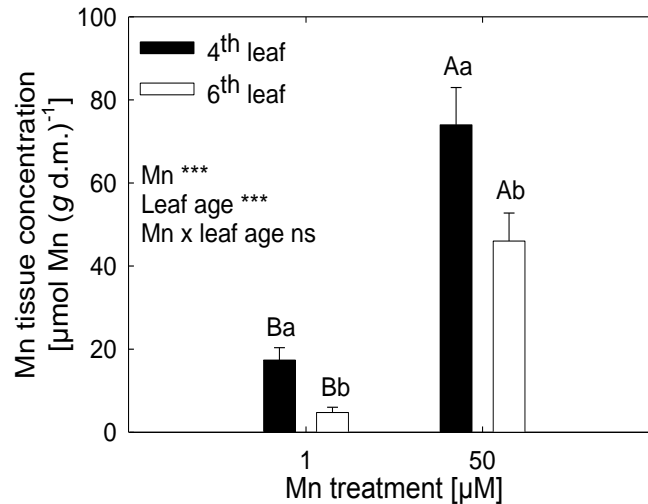

FIG. S2. Specific guaiacol-POD (A) and specific NADH-POD (B) activities of rice leaf blades of different leaf age before and after elevated Mn supply (50  $\mu\text{M}$ ) for 72 h. Different upper case letters indicate significant differences ( $P < 0.05$ ) between different Mn levels of one leaf age according to Tukey; different lower case letters indicate significant differences ( $P < 0.05$ ) between different leaf ages of one level of Mn treatment. Different levels of significance according to a two-factor ANOVA for  $P < 0.001$ ,  $P < 0.01$ ,  $P < 0.05$  and non-significant are labelled with \*\*\*, \*\*, \* and ns, respectively.

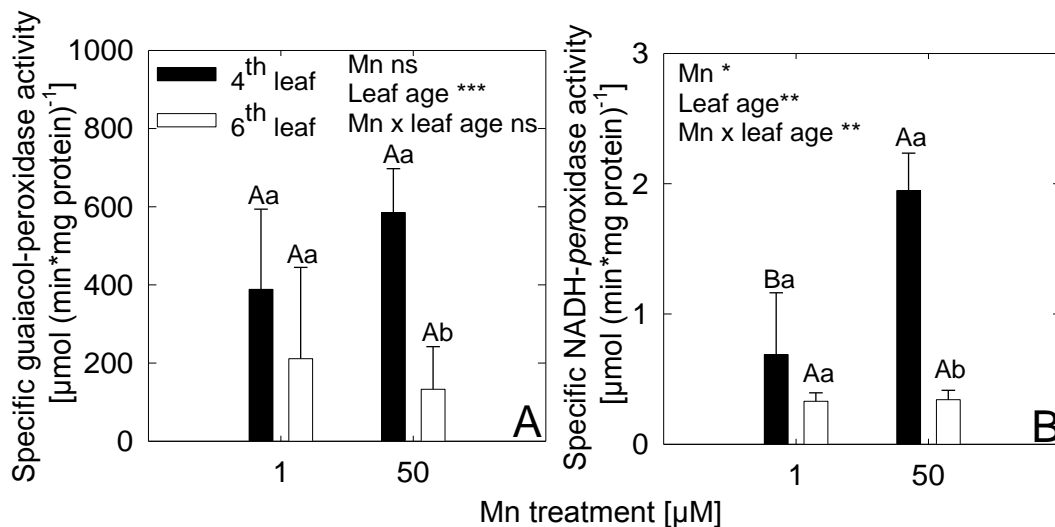

FIG. S3. Protein content of rice leaf blades of different leaf age before and after elevated Mn supply (50  $\mu\text{M}$ ) for 72 h. Different upper case letters indicate significant differences ( $P < 0.05$ ) between different Mn levels of one leaf age according to Tukey; different lower case letters indicate significant differences ( $P < 0.05$ ) between different leaf ages of one level of Mn treatment. Different levels of significance according to a two-factor ANOVA for  $P < 0.001$ ,  $P < 0.01$ ,  $P < 0.05$  and non-significant are labelled with \*\*\*, \*\*, \* and ns, respectively.

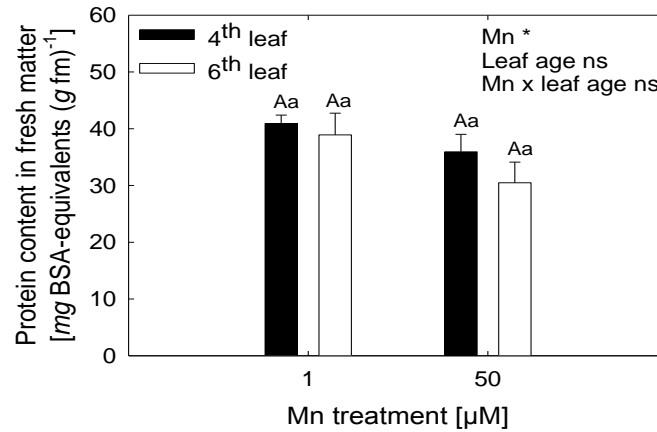

FIG. S4. Representative Coomassie-stained close-ups of regions containing Mn-influenced protein spots 2 and 7 extracted from the older fourth leaves of Mn control (left) and Mn-treated (left) plants. A complete 2D/IEF-SDS-PAGE resolution of the proteome is given in Fig. 9. Three replications of each treatment were analysed using the Imagemaster™ 2D PLATINUM Software 6.0. Significantly regulated ( $P < 0.05$ ) protein spots (marked by arrows) were cut and identified by nanoLC-MS/MS.

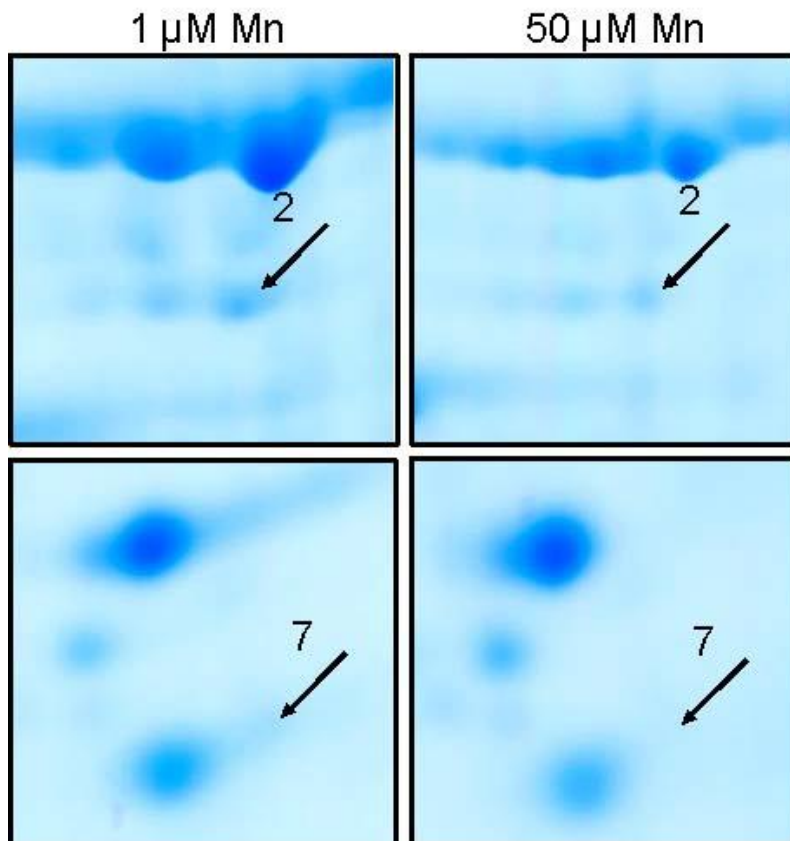

FIG. S5. Representative Coomassie-stained close-ups of regions containing Mn-influenced protein spots 5, 8 and 9 extracted from the younger sixth leaves of Mn control (left) and Mn-treated (left) plants. A complete 2D IEF/SDS-PAGE resolution of the proteome is given in Fig. 9. Three replications of each treatment were analysed using the Imagemaster™ 2D PLATINUM Software 6.0. Significantly regulated ( $P < 0.05$ ) protein spots (marked by arrows) were cut and identified by nanoLC-MS/MS.

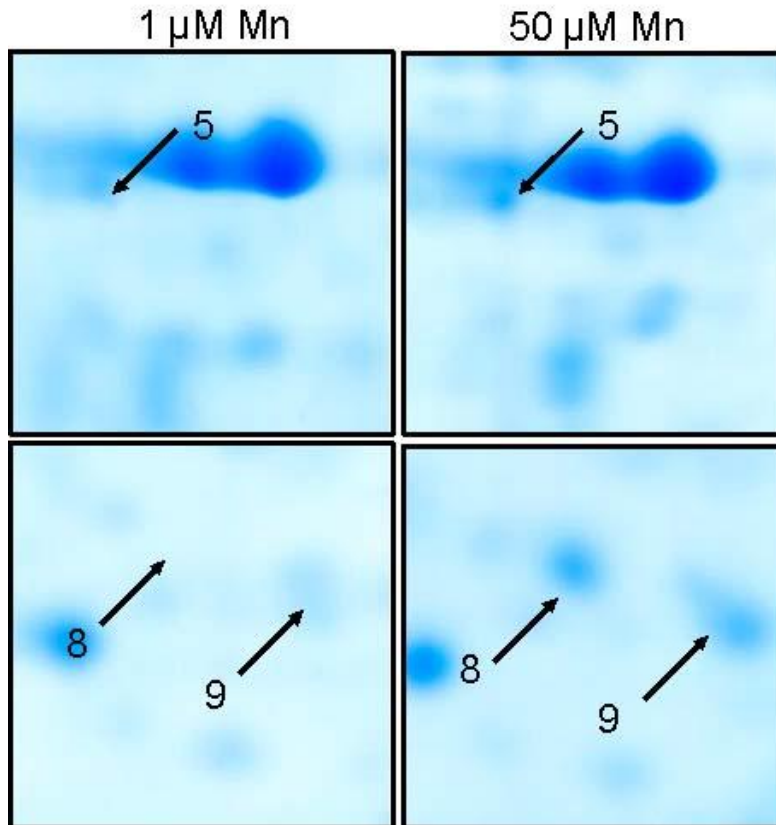

FIG. S6. Representative Coomassie-stained close-ups of regions containing protein spots 1, 4 and 6 differing in abundance between the younger sixth (right) and the older fourth (left) leaves of Mn control plants. A complete 2D IEF/SDS-PAGE resolution of the proteome is given in Fig. 9. Three replications of each treatment were analysed using the Imagemaster™ 2D PLATINUM Software 6.0. Significantly regulated ( $P < 0.05$ ) protein spots (marked by arrows) were cut and identified by nanoLC-MS/MS.

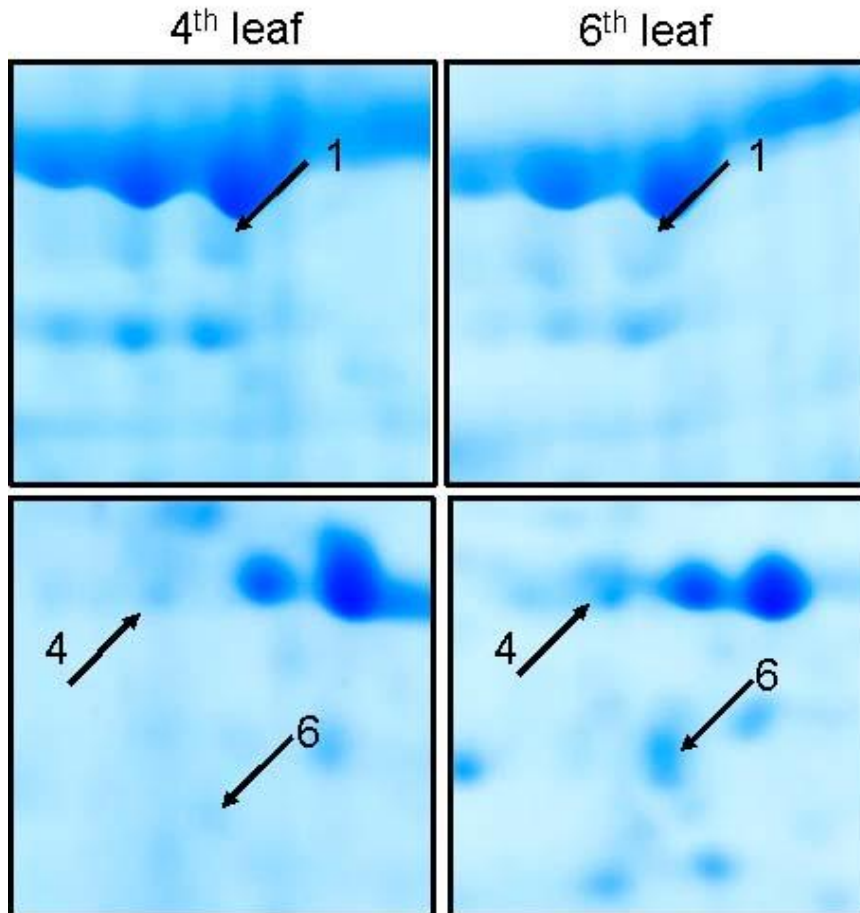

FIG. S7. Representative Coomassie-stained close-ups of regions containing protein spots 3, 7, 8, 10, 11, 12 and 13 differing in abundance between the younger sixth (right) and the older fourth (left) leaves of Mn-treated plants. A complete 2D IEF/SDS-PAGE resolution of the proteome is given in Fig. 9. Three replications of each treatment were analysed using the Imagemaster™ 2D PLATINUM Software 6.0. Significantly regulated ( $P < 0.05$ ) protein spots (marked by arrows) were cut and identified by nanoLC-MS/MS.

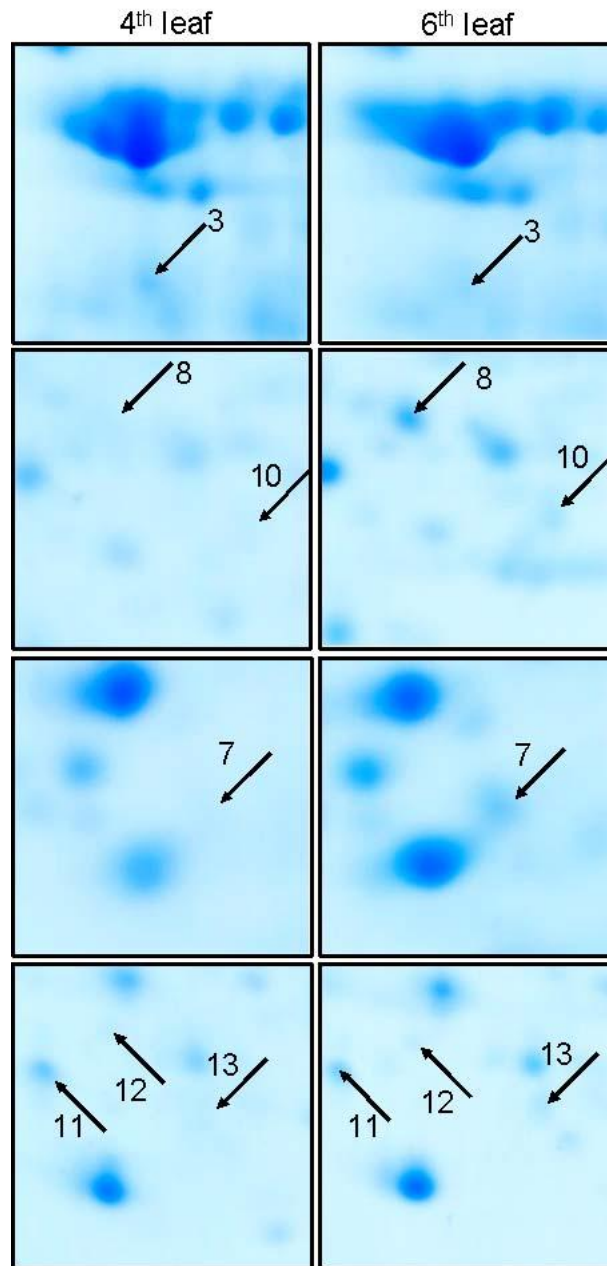

TABLE S1. Identity and peptide alignment of proteins changed in abundance after elevated Mn supply in the older (fourth) leaf of rice

| Protein no. <sup>a</sup> | Acc. no. <sup>b</sup> | Identity <sup>c</sup>                          | Organism <sup>d</sup> | Peptide sequence <sup>e</sup>                                                                                                                                                                                                                                                                                                                                                                                                                                                                                          | Coverage (%) <sup>f</sup> |
|--------------------------|-----------------------|------------------------------------------------|-----------------------|------------------------------------------------------------------------------------------------------------------------------------------------------------------------------------------------------------------------------------------------------------------------------------------------------------------------------------------------------------------------------------------------------------------------------------------------------------------------------------------------------------------------|---------------------------|
| 2                        | BAD16832              | Chloroplast translational elongation factor Tu | <i>Oryza sativa</i>   | MASLASASASTSLVFSTSSSKPRLGSSVGFSSPARFRRTAAA<br>AASRGTGRRAGLLVRAARGKFERTKPHVNIQTIGHVDHGKI<br>TLTAALTMVLASVGGAPKKYDEIDAAPEERARGITINTATVEY<br>ETETRHYAHVDCPGHADYVKNMITGAAQMDGAILVSGADG<br>PMPQTKEHILLAKQVGVPKIVVFLNKKDQVDDEELLQLVELEV<br>RELLSSYEYDGDVEPIVAGSALKALENLMANPAIKRGDDEWV<br>DGIFSLIDSVDNYPVPQRQTDLPFLLAVEDVFSITGRGTVATG<br>RIERGTVKVGDTVDIVGIRETRNCTVTGVEMFQKTMDAMAG<br>DNVGLLLRGMQKDDIERGMVLAKPASITPHTKFDVVVYLK<br>DEGGRHSPFFPGYRPPQFYMRTTDTGNVTKIMNDKDEEAKM<br>CMPGDRVKMVELIQPVACEQGMRFIREGGKTVGAGVINTI<br>LK | 28.40                     |
| 7                        | NP_001048<br>798      | 50S ribosomal protein L11                      | <i>Oryza sativa</i>   | MATTSLSLHGVPSPTATKLSSSFLGAPASFLRPTPPPLAAPSR<br>RALAVRAMAPPKPGGKPKKVGLIKLALAEAGKATPAPPVGP<br>LGAKGVNIMSFCKEYNAKTAEKAGYIIPVEITVFDDKSFTFILKT<br>PPASVLLLKAAGIEKGSKEPQREKVGKVTADQVRTIAQEKLDP<br>LNCKSIDSAMRIAGTAANMGIEVDPPILEKKEKVL                                                                                                                                                                                                                                                                                        | 29.90                     |

<sup>a</sup> Numbers in the table correspond to numbers given in Fig. 9.

<sup>b</sup> Accession numbers correspond to proteins identified at the NCBI homepage showing sequence homology with the detected protein spot.

<sup>c</sup> Identities are based on sequence comparisons using the NCBI protein database.

<sup>d</sup> Origin species of the corresponding protein.

<sup>e</sup> Amino acid sequence of the corresponding protein (identified by nano-LC-MS/MS; sequence homologies between protein spot and corresponding database hit)

<sup>f</sup> Coverage of the peptides identified by mass spectrometry

TABLE S2. Identity and peptide alignment of proteins changed in abundance after elevated Mn supply in the younger (sixth) leaf of rice

| Protein no. <sup>a</sup> | Acc. no. <sup>b</sup> | Identity <sup>c</sup>                         | Organism <sup>d</sup> | Peptide sequence <sup>e e</sup>                                                                                                                                                                                                                                                                                                                                      | Coverage (%) <sup>f</sup> |
|--------------------------|-----------------------|-----------------------------------------------|-----------------------|----------------------------------------------------------------------------------------------------------------------------------------------------------------------------------------------------------------------------------------------------------------------------------------------------------------------------------------------------------------------|---------------------------|
| 5                        | BAD16934              | Putative inorganic pyrophosphatase            | <i>Oryza sativa</i>   | MATAATASATAATRFRTRLAGVGLRRTARLPTAVRFQRRVLAT<br>TALLRTAELRPKEQGLPETLDYRVFLVDGGGRKVPWHDVPL<br><u>RAGDGVFHFVVEIPKESSAKMEVATDESFTPIKQDTKKGNLR</u><br>YYPYNINWNYGLFPQTWEDPTLANTDVEGAFGDNDPVDVVEI<br>GERRANIGDVLKVKPLAALAMIDEGELDWKIVAIISLDDPKASLV<br>NDVDDVEKHFPGLTALRDWFRDYKIPDGKPANRFGLGNKPT<br>SKEYALKVIEETNESWEKLVKRNIPAGELSLA                                        | 34.40                     |
| 8                        | NP_00106699<br>8      | Probenazole-inducible protein PBZ1            | <i>Oryza sativa</i>   | MAPACVSDEHAVAVSAERLWKAFMDASTLPKACAGLVDDIAV<br>EGNGGPGTIYTMKLNPAAGVGSTYKTRVAVCDAASHVLKSD<br>VLEAESKVGKLSHSTETKLEATGDGSCVAKLKVEYELEDGS<br><u>SLSPEKEKDIDGYYGMLKMIEDYLVAHPAEYA</u><br>MAGEAAAAERWVGAADFSEGSRAALRWAADNLLRAGDHLI<br>LLHVLKDPDYEQGETLLWEATGSPLIPLSDFSEPTIAKKYGAK<br>PDAETLDMLNTVARQKEVVVVFVVLWGDPREKLCQAINIIPM<br>SCLVIGSRGLGKLRVLLGSVSDYVVNNATCPVTVVKTADG | 67.70                     |
| 9                        | NP_00105470<br>4      | Universal stress protein (Usp) family protein | <i>Oryza sativa</i>   | MAGEAAAAERWVGAADFSEGSRAALRWAADNLLRAGDHLI<br>LLHVLKDPDYEQGETLLWEATGSPLIPLSDFSEPTIAKKYGAK<br>PDAETLDMLNTVARQKEVVVVFVVLWGDPREKLCQAINIIPM<br>SCLVIGSRGLGKLRVLLGSVSDYVVNNATCPVTVVKTADG                                                                                                                                                                                    | 18.00                     |

<sup>a</sup> Numbers in the table correspond to numbers given in Fig. 9.

<sup>b</sup> Accession numbers correspond to proteins identified at the NCBI homepage showing sequence homology with the detected protein spot.

<sup>c</sup> Identities are based on sequence comparisons using the NCBI protein database.

<sup>d</sup> Origin species of the corresponding protein.

<sup>e</sup> Amino acid sequence of the corresponding protein (identified by nano-LC-MS/MS, sequence homologies between protein spot and corresponding database hit)

<sup>f</sup> Coverage of the peptides identified by mass spectrometry.

TABLE S3. Identity and peptide alignment of proteins differing in abundance between the Mn-control (0.2  $\mu$ M) older (fourth) and the younger (sixth) leaf of rice

| Protein no. <sup>a</sup> | Acc.no. <sup>b</sup> | Identity <sup>c</sup>                                     | Organism <sup>d</sup> | Peptide sequence <sup>e</sup>                                                                                                                                                                                                                                                                                                                                                                                                                                                                                                                                                      | Coverage (%) <sup>f</sup> |
|--------------------------|----------------------|-----------------------------------------------------------|-----------------------|------------------------------------------------------------------------------------------------------------------------------------------------------------------------------------------------------------------------------------------------------------------------------------------------------------------------------------------------------------------------------------------------------------------------------------------------------------------------------------------------------------------------------------------------------------------------------------|---------------------------|
| 1                        | Q42971               | Enolase (2-phosphoglycerate dehydratase)                  | <i>Oryza sativa</i>   | <u>MAATIVSVKARQIFDSRGNPTVEVDVCCSDGTFARAAPVPSGA</u><br><u>STGVYEALELRDGGSDYLGKGVSKAVDNVNSVIAPALIGKDP</u><br><u>TSQAELDNFMVQQLDGTKNEWGWCKQKLGANAILAVSLAIC</u><br><u>KAGAIKKIPLYQHIANLAGNKQLVLPVPFNVINGGSHAGNKL</u><br><u>AMQEFMILPTGAASFKEAMKMGVEVYHNLKSVIKKKYQQDAT</u><br><u>NVGDEGGFAPNIQENKEGLELLKTAIEKAGYTGKVVIGMDVAA</u><br><u>SEFYNDKDKTYDLNFKKEENNDGSQKISGDSLKNVYKSFVSEY</u><br><u>PIVSIEDPFDQDDWEHYAKMTAEIGEQQVIVGDDLLVTNPTRV</u><br><u>AKAIQEKSCNALLLKVNQIGSVTESIEAVKMSKRAGWGVMTS</u><br><u>HRSGETEDTFIADLAVGLATGQIKTGAPCRSERLAKYNQLLR</u><br><u>EEELGAAAVYAGAKFRAPVEPY</u> | 48.40                     |
| 4                        | NP_001043<br>134     | Oxygen-evolving enhancer protein 1, chloroplast precursor | <i>Oryza sativa</i>   | <u>MAASLQAAATLMQPAKLGGRASSAALPSRPSSHVARAFGVD</u><br><u>TGAAGRITCSLQSDIREVANKCADAAGLAGFALATSALLVSGA</u><br><u>SAEGVPRRLTFDEIQSKTYMEVKGTGTANQCPTVEGGVDSF</u><br><u>AFKAGKYNMKKFCLEPTSFVKAEGVAKNAPPEFQKTKLMTR</u><br><u>LYTLDEIEGPLVSSDGTIKFEEKDGIDYAAVTVQLPGGERV</u><br><u>PFLFTIKNLVATGKPESFGGPFVLPVSYRGSFDPKGRGGST</u><br><u>GYDNAVALPAGGRGDEEELAKENVKNASSSTGNITLSVTKSK</u><br><u>PETGEVIGVFESVQPSDIDLGAKVPKDVKIQQVWYAQLE</u>                                                                                                                                                      | 33.90                     |
| 6                        | NP_001063<br>793     | Ribonuclease T2 family protein                            | <i>Oryza sativa</i>   | <u>MEQRKFLCLILGLLATSGPAKTVNADSPFDFFYLILMWPGAY</u><br><u>CTDSEYGCCVPKYGYPSEDFVKSFMFDSSSENTAVVRCNS</u><br><u>DNPFDINKLDSIENNLNHYWSNIKCPRTDGVNSWKSEWNSY</u><br><u>GVCSGLKELDYFKAGLQLRKNADVLSALAEQGIKPDYQLYNT</u><br><u>AFIKWAVNQKLGVTGPVQCRDGFPGKKQLYEIYLCVDKDAKS</u><br><u>FIDCPVLPNLSCPAEVLFPFHTWMLNNTSAANIVMPTETVLA</u>                                                                                                                                                                                                                                                            | 40.10                     |

<sup>a</sup> Numbers in the table correspond to numbers given in Fig. 9.

<sup>b</sup> Accession numbers correspond to proteins identified at the NCBI homepage showing sequence homology with the detected protein spot.

<sup>c</sup> Identities are based on sequence comparisons using the NCBI protein database.

<sup>d</sup> Origin species of the corresponding protein.

<sup>e</sup> Amino acid sequence of the corresponding protein (identified by nano-LC-MS/MS, sequence homologies between protein spot and corresponding database hit

<sup>f</sup> Coverage of the peptides identified by mass spectrometry.



TABLE S4. Identity and peptide alignment of proteins differing in abundance between the Mn-treated (50 µM) older (fourth) and younger (sixth) leaf of rice

| Protein no. <sup>a</sup> | Acc. no. <sup>b</sup> | Identity <sup>c</sup>                                                       | Organism <sup>d</sup> | Peptide sequence <sup>e</sup>                                                                                                                                                                                                                                                                                                                                                                                 | Coverage (%) <sup>f</sup> |
|--------------------------|-----------------------|-----------------------------------------------------------------------------|-----------------------|---------------------------------------------------------------------------------------------------------------------------------------------------------------------------------------------------------------------------------------------------------------------------------------------------------------------------------------------------------------------------------------------------------------|---------------------------|
| 3                        | NP_001047<br>479      | Adenosine 5'-phosphotransferase 2                                           | <i>Oryza sativa</i>   | MASEGVLLGMGNPLLDISAVVDDAFLTKYDVKLNAILAEEKH<br>LPMYDELASKGNVEYIAGGATQNSIRVAQWMLQTPGATSYM<br>GCIGKDKFGEEMKKNQAAGVTAHYEEDAAPTGTCAVCVV<br>GGERSLVANLSAANCYKSEHLKPPENWALVEKAKYIYIAGFFL<br>TVSPDSIQLVAEHAAANNKVFMLNLSAPFICEFFRDAQEKVLP<br>FVDYIFGNETEARIFAKVRGWETENVEEIALKISQLPLASGKQK<br>RIAVITQGADPVVAEDGQVKTFFVILLPKEKLVDTNGAGDAF<br>VGGFLSQLVQQSIEDSVKAGCYAANVIIQRSGCTYPEKPDF<br>N                              | 43.70                     |
| 7                        | NP_001048<br>798      | 50S ribosomal protein L11                                                   | <i>Oryza sativa</i>   | MATTSLSLHGVPSPATKLSSSFLGAPASFLRPTPPPLAAPS<br>RALAVRAMAPPKPGGKPKKVVGLIKLALAEAGKATPAPPVGP<br>LGAKGVNIMSFCKEYNAKTAEKAGYIIPVEITVFDDKSFTFILKT<br>PPASVLLLKAAGIEKGSKEPQREKVGKVTADQVRTIAQEKLPD<br>LNCKSIDSAMRIAGTAANMGIEVDPPILEKKEKVL<br>MAPACVSDEHAVAVSAERLWKAFFMDASTLPKACAGLVDDIAV<br>EGNGGPGTIYTMKLNPAAGVVGSTYKTRVAVCDAAASHVLKSD<br>VLEAESKVGKLSHSTETKLEATGDGSCVAKLKVEYELEDGS<br>SLSPEKEKDIDGYYGMLKMIEDYLVHHPAEYA | 36.20                     |
| 8                        | NP_001066<br>998      | Probenazole-inducible protein PBZ1                                          | <i>Oryza sativa</i>   | MAEETPVETPAAPVLGEPMDLMTALQLVMKKSSAHDGLVKG<br>LREAAKAEKHAALCVLAEDCDQPDYVVKLVKALCAEHNHVL<br>VTVPSAKTLGEWAGLCKIDSEGKARKVVGCSVCVVVKDYGEE<br>SEGLNIVQDYVKSH                                                                                                                                                                                                                                                        | 66.50                     |
| 10                       | NP_001058<br>899      | 40S ribosomal protein S12                                                   | <i>Oryza sativa</i>   | MAATALSSQVRLPMSLRVATAPAPARVSVLPASNKLGDRLM<br>QATYNVKLITPDGEVELQVPDDVYILDQAEEDLDPYSCRAG<br>SCSSCAGVVSGEIDQSDQSFLDDDQVAAGWVLTCHAYPKS<br>DVVIETHKEDDLI                                                                                                                                                                                                                                                           | 14.20                     |
| 11                       | A2YQD9                | Ferredoxin-1, chloroplast precursor (Ferredoxin I) (Anti-disease protein 1) | <i>Oryza sativa</i>   | MGVYTFVCRSSGDEWTAKQLKGELEASAATPYELQRRLVAA<br>ASAADSAAGVQSSFSMVPSSAVFQVIIGAVGGGAAIGGGAA<br>AGAASGGAAEAPKAEKKEEKEESEDLDLGFSLFD<br>MALSLSTSFLPTQAAAAATRTRLRSLVPSQRMRCMRKKG<br>LHPEIYEDAKVYCNGELVLTGGTKPEYTVDVVWVSGNHPYVGD<br>TSAMVVMDSQIEKFRKKWGHIEKYWPEDQWREMHDPGDPE<br>FDPEEEGSAGAS                                                                                                                            | 33.10                     |
| 12                       | P56724                | 60S acidic ribosomal protein P3 (P1/P2-like)                                | <i>Oryza sativa</i>   |                                                                                                                                                                                                                                                                                                                                                                                                               | 19.30                     |
| 13                       | NP_001043<br>653      | Ribosomal protein L31 family protein                                        | <i>Oryza sativa</i>   |                                                                                                                                                                                                                                                                                                                                                                                                               | 14.80                     |

<sup>a</sup> Numbers in the table correspond to numbers given in Fig. 9.

<sup>b</sup> Accession numbers correspond to proteins identified at the NCBI homepage showing sequence homology with the detected protein spot.

<sup>c</sup> Identities are based on sequence comparisons using the NCBI protein database.

<sup>d</sup> Origin species of the corresponding protein.

<sup>e</sup> Amino acid sequence of the corresponding protein (identified by nano-LC-MS/MS, sequence homologies between protein spot and corresponding database hit

<sup>f</sup> Coverage of the peptides identified by mass spectrometry.
